# Supplementary material
Source: MDPI journal article supplement (https://www.mdpi.com/1424-2818/15/2/252)
Supplement: s1 [file s1]

Table S1. Number of animals with an inbreeding coefficient of 0 or >0 and frequencies of the inbreeding coefficients of the five bovine breeds analyse at different ranges.

| <b>F</b>   | <b>Frieiresa</b> | <b>Caldela</b> | <b>Cachena</b> | <b>Limia</b> | <b>Vianesa</b> |
|------------|------------------|----------------|----------------|--------------|----------------|
| 0          | 1048             | 1945           | 6252           | 1550         | 4277           |
| >0         | 3393             | 7433           | 21952          | 4252         | 9882           |
| >0 - 0.03  | 0.51076          | 0.54352        | 0.73152        | 0.43838      | 0.64187        |
| 0.031-0.06 | 0.28824          | 0.24876        | 0.13922        | 0.31538      | 0.19409        |
| 0.061-0.09 | 0.08989          | 0.06485        | 0.04608        | 0.10019      | 0.04807        |
| 0.091-0.12 | 0.02210          | 0.02597        | 0.00676        | 0.02187      | 0.00789        |
| 0.121-0.15 | 0.02653          | 0.03969        | 0.02024        | 0.03951      | 0.02975        |
| 0.151-0.18 | 0.00825          | 0.00996        | 0.00593        | 0.01411      | 0.00638        |
| 0.181-0.21 | 0.00295          | 0.00525        | 0.00384        | 0.00188      | 0.00293        |
| 0.211-0.24 | 0.00088          | 0.00108        | 0.00093        | 0.00141      | 0.00101        |
| 0.241-0.27 | 0.02181          | 0.04251        | 0.04641        | 0.04539      | 0.05070        |
| 0.271-0.3  | 0.02299          | 0.01170        | 0.00820        | 0.00917      | 0.00982        |
| 0.301-0.33 | 0.00531          | 0.00471        | 0.00361        | 0.00400      | 0.00415        |
| 0.331-0.36 | 0.00000          | 0.00067        | 0.00144        | 0.00235      | 0.00051        |
| 0.361-0.39 | 0.00029          | 0.00135        | 0.00111        | 0.00282      | 0.00121        |
| 0.391-0.42 |                  |                | 0.00069        | 0.00024      | 0.00020        |
| 0.421-0.45 |                  |                | 0.00005        | 0.00024      |                |
| 0.451-0.48 |                  |                | 0.00042        |              |                |
| 0.481-0.51 |                  |                | 0.00014        |              |                |
| 0.511-0.54 |                  |                | 0.00005        |              |                |
| 0.541-0.57 |                  |                | 0.00005        |              |                |
